# Supplementary material for: Phase 2 prospective analysis of alectinib in ALK-positive, crizotinib-resistant non-small-cell lung cancer
Source: PubMed Central journal article supplement — Lancet Oncol. Author manuscript; Available in PMC 2017 Feb 1. (PMC4752892; doi:10.1016/s1470-2045(15)00488-x), 2015-12-19

**Phase 2 prospective analysis of alectinib in *ALK*-positive, crizotinib-resistant non-small-cell lung cancer**

All investigators in the phase 2 NCT01871805 alectinib study

| <b>Principal Investigator</b> | <b>Institution</b>                                                                | <b>Number of patients recruited</b> |
|-------------------------------|-----------------------------------------------------------------------------------|-------------------------------------|
| Alice Shaw                    | Massachusetts General Hospital, Boston, MA                                        | 9                                   |
| Sai-Hong Ou                   | University of California Irvine, Orange, CA                                       | 9                                   |
| Gregory Riely                 | Memorial Sloan-Kettering Cancer Center, New York City, NY                         | 6                                   |
| Jeremy Centar                 | Oregon Health and Science University, Portland, OR                                | 6                                   |
| Leena Gandhi                  | Dana Farber Cancer Institute, Boston, MA                                          | 6                                   |
| Howard West                   | Swedish Cancer Institute, Seattle, WA                                             | 5                                   |
| Ross Camidge                  | University of Colorado Cancer Center, Aurora, CO                                  | 5                                   |
| Mark Socinski                 | University of Pittsburgh Cancer Pavillion, Pittsburgh, PA                         | 5                                   |
| Alberto Chiappori             | Moffitt Cancer Center, Tampa, FL                                                  | 4                                   |
| Tarek Mekhail                 | Florida Hospital Cancer Institute, Orlanda, FL                                    | 4                                   |
| Ticiana Leal                  | University of Wisconsin, Madison, WI                                              | 3                                   |
| Keisuke Shirai                | MUSC Hollings Cancer Center, Charleston, SC                                       | 3                                   |
| Bo Chao                       | Ohio State University Comprehensive Cancer Center                                 | 3                                   |
| Jennifer Ejen Tseng           | UF Health Orlando, Orlando, FL                                                    | 2                                   |
| Hossein Borghaei              | Fox Chase Cancer Center, Philadelphia, PA                                         | 2                                   |
| Lyudmila Bazhenova            | UCSD Moores Cancer Center, La Jolla, CA                                           | 2                                   |
| Jonathan Goldman              | UCLA, Los Angeles, CA                                                             | 2                                   |
| Kathryn Gold                  | MD Anderson Cancer Center, Houston, TX                                            | 2                                   |
| Victor Cohen                  | McGill University, Sir Mortimer B Davis Jewish General Hospital, Montreal, Quebec | 1                                   |
| Shirish Gadgeel               | Wayne State University and Karmanos Cancer Center, Detroit, MI                    | 1                                   |
| Hongbin Chen                  | Roswell Park Cancer Institute, Buffalo, NY                                        | 1                                   |
| Jimmy Ruiz                    | Wake Forest University Health Sciences, Winston-Salem, NC                         | 1                                   |
| Laurie Carr                   | National Jewish Health, Denver, CO                                                | 1                                   |
| Russell Devore III            | Center for Biomedical Research, Knoxville, TN                                     | 1                                   |
| Neil Belman                   | St Luke's Hospital, Bethlehem, PA                                                 | 1                                   |
| Edward Santos                 | Lynn Regional Cancer Center West, Boca Raton, FL                                  | 1                                   |
| Chandra Belani                | Penn State Hershey Cancer Institute, Hershey, PA                                  | 1                                   |

**Supplementary Figure S1: Duration of response**

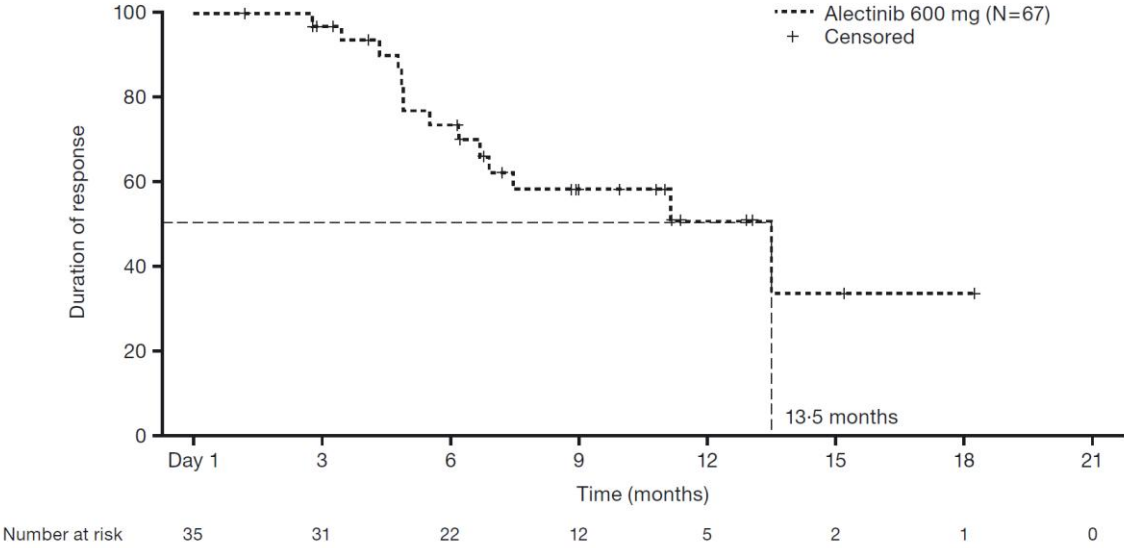

**Supplementary Figure S2: Patient reported outcomes. (A) Global health status (B) Fatigue.**  
 Shown in each plot are means with 95% CIs.

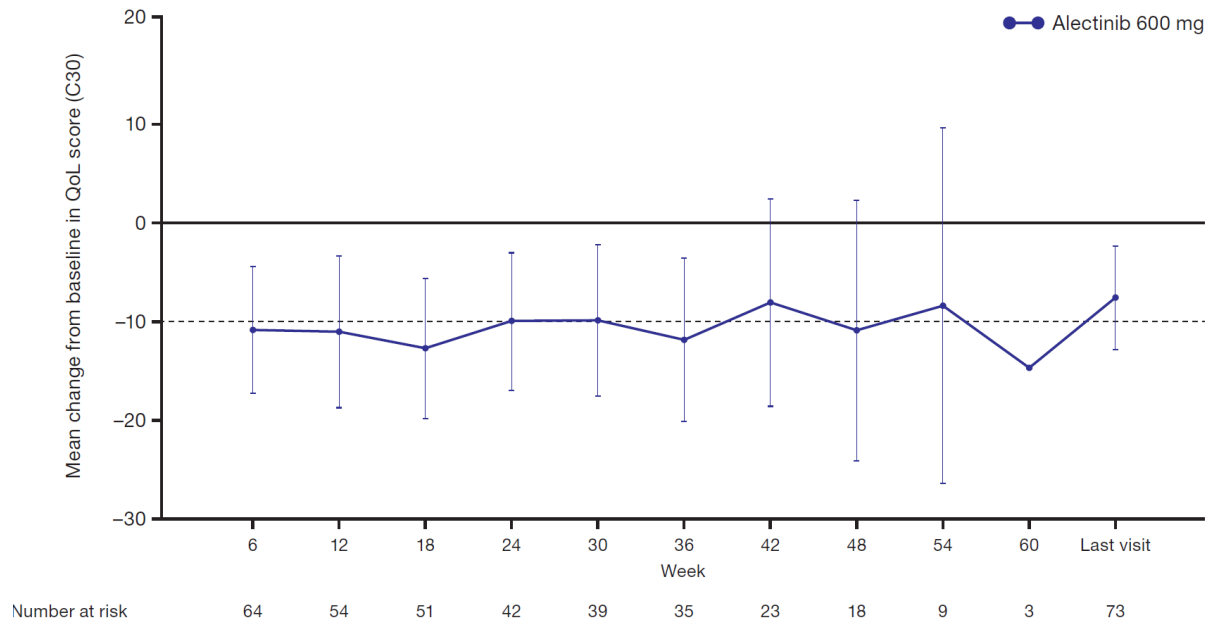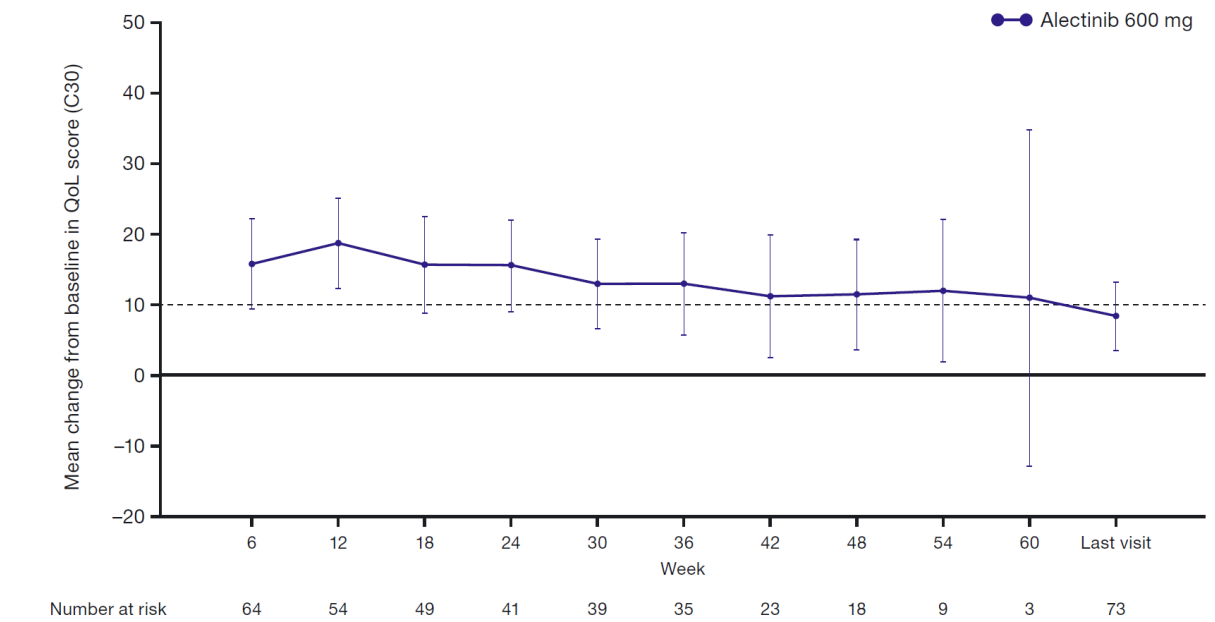

Supplement: NIHMS750484-supplement-1.pdf [file NIHMS750484-supplement-1.pdf]
